# Supplementary material for: Effect of Disease Severity, Age of Child, and Clinic No-Shows on Unscheduled Healthcare Use for Childhood Asthma at an Academic Medical Center
Source: MDPI journal article supplement (doi:10.3390/ijerph20021508), 2023-01-13
Supplement: s1 [file s1]

## Supplementary Tables

**Table S1.** Contingency Analysis for DV1.

| Parameter                            | Non-Users  | Users      | Total      | %           | Fisher's Exact Test<br><i>p</i> -Value |
|--------------------------------------|------------|------------|------------|-------------|----------------------------------------|
| <i>Individual Demographics (IVs)</i> |            |            |            |             |                                        |
| Age: 0-to-<8 years                   | 152        | 53         | 205        | 50%         | 1.0000                                 |
| Age: 8-to-<13 years                  | 105        | 36         | 141        | 34%         |                                        |
| Age: 13-to-<17 years                 | 35         | 12         | 47         | 11%         |                                        |
| Age: ≥17 years                       | 13         | 4          | 17         | 4%          |                                        |
| <b>Total</b>                         | <b>305</b> | <b>105</b> | <b>410</b> | <b>100%</b> |                                        |
| Gender: Male                         | 205        | 66         | 271        | 66%         | 0.4734                                 |
| Gender: Female                       | 100        | 39         | 139        | 34%         |                                        |
| <b>Total</b>                         | <b>305</b> | <b>105</b> | <b>410</b> | <b>100%</b> |                                        |
| Race: Caucasian                      | 107        | 28         | 135        | 33%         | 0.2484                                 |
| Race: African-American               | 157        | 66         | 223        | 54%         |                                        |
| Race: Hispanic                       | 16         | 5          | 21         | 5%          |                                        |
| Race: Other                          | 25         | 6          | 31         | 8%          |                                        |
| <b>Total</b>                         | <b>305</b> | <b>105</b> | <b>410</b> | <b>100%</b> |                                        |
| Insurance: Medicaid                  | 158        | 73         | 231        | 56%         | 0.0042*                                |
| Insurance: Private                   | 144        | 31         | 175        | 43%         |                                        |
| Insurance: Other                     | 3          | 1          | 4          | 1%          |                                        |
| <b>Total</b>                         | <b>305</b> | <b>105</b> | <b>410</b> | <b>100%</b> |                                        |
| <i>Individual Risk Factors (IVs)</i> |            |            |            |             |                                        |
| Asthma Severity: Intermittent        | 51         | 7          | 58         | 14%         | <.0001*                                |
| Asthma Severity: Mild-Persistent     | 180        | 32         | 212        | 52%         |                                        |
| Asthma Severity: Moderate-Persistent | 65         | 53         | 118        | 29%         |                                        |
| Asthma Severity: Severe-Persistent   | 9          | 13         | 22         | 5%          |                                        |
| <b>Total</b>                         | <b>305</b> | <b>105</b> | <b>410</b> | <b>100%</b> |                                        |
| BMI: Normal                          | 169        | 70         | 239        | 58%         | 0.0702                                 |
| BMI: Overweight                      | 44         | 15         | 59         | 14%         |                                        |
| BMI: Obese                           | 92         | 20         | 112        | 27%         |                                        |
| <b>Total</b>                         | <b>305</b> | <b>105</b> | <b>410</b> | <b>100%</b> |                                        |
| Medication Adherence: Yes            | 240        | 80         | 320        | 78%         | 0.5871                                 |
| Medication Adherence: No             | 65         | 25         | 90         | 22%         |                                        |
| <b>Total</b>                         | <b>305</b> | <b>105</b> | <b>410</b> | <b>100%</b> |                                        |
| Smoking: Yes                         | 53         | 19         | 72         | 18%         | 0.8822                                 |
| Smoking: No                          | 252        | 86         | 338        | 82%         |                                        |

|                                         |            |            |            |             |         |
|-----------------------------------------|------------|------------|------------|-------------|---------|
| <b>Total</b>                            | <b>305</b> | <b>105</b> | <b>410</b> | <b>100%</b> |         |
| 12-Month Clinic No-Shows: 0 (Zero)      | 270        | 71         | 341        | 83%         |         |
| 12-Month Clinic No-Shows: 1-to-2        | 31         | 22         | 53         | 13%         |         |
| 12-Month Clinic No-Shows: 3-to-4        | 4          | 4          | 8          | 2%          | <.0001* |
| 12-Month Clinic No-Shows: >4            | 0          | 8          | 8          | 2%          |         |
| <b>Total</b>                            | <b>305</b> | <b>105</b> | <b>410</b> | <b>100%</b> |         |
| 12-Month Clinic Cancellations: 0 (Zero) | 183        | 35         | 218        | 53%         |         |
| 12-Month Clinic Cancellations: 1-to-5   | 118        | 64         | 182        | 44%         |         |
| 12-Month Clinic Cancellations: ≥6       | 4          | 6          | 10         | 2%          | <.0001* |
| <b>Total</b>                            | <b>305</b> | <b>105</b> | <b>410</b> | <b>100%</b> |         |

**Table S2.** Contingency Analysis for DV2.

| Parameter                            | Non-Users  | Users      | Total      | %           | Fisher's Exact Test<br><i>p</i> -Value |
|--------------------------------------|------------|------------|------------|-------------|----------------------------------------|
| <i>Individual Demographics (IVs)</i> |            |            |            |             |                                        |
| Age: 0-to-<8 years                   | 138        | 67         | 205        | 50%         | 0.9361                                 |
| Age: 8-to-<13 years                  | 95         | 46         | 141        | 34%         |                                        |
| Age: 13-to-<17 years                 | 34         | 13         | 47         | 11%         |                                        |
| Age: ≥17 years                       | 12         | 5          | 17         | 4%          |                                        |
| <b>Total</b>                         | <b>279</b> | <b>131</b> | <b>410</b> | <b>100%</b> |                                        |
| Gender: Male                         | 188        | 83         | 271        | 66%         | 0.4352                                 |
| Gender: Female                       | 91         | 48         | 139        | 34%         |                                        |
| <b>Total</b>                         | <b>279</b> | <b>131</b> | <b>410</b> | <b>100%</b> |                                        |
| Race: Caucasian                      | 103        | 32         | 135        | 33%         | 0.0331*                                |
| Race: African-American               | 138        | 85         | 223        | 54%         |                                        |
| Race: Hispanic                       | 15         | 6          | 21         | 5%          |                                        |
| Race: Other                          | 23         | 8          | 31         | 8%          |                                        |
| <b>Total</b>                         | <b>279</b> | <b>131</b> | <b>410</b> | <b>100%</b> |                                        |
| Insurance: Medicaid                  | 143        | 88         | 231        | 56%         | 0.0064*                                |
| Insurance: Private                   | 133        | 42         | 175        | 43%         |                                        |
| Insurance: Other                     | 3          | 1          | 4          | 1%          |                                        |
| <b>Total</b>                         | <b>279</b> | <b>131</b> | <b>410</b> | <b>100%</b> |                                        |
| <i>Individual Risk Factors (IVs)</i> |            |            |            |             |                                        |
| Asthma Severity: Intermittent        | 49         | 9          | 58         | 14%         | <.0001*                                |
| Asthma Severity: Mild-Persistent     | 164        | 48         | 212        | 52%         |                                        |
| Asthma Severity: Moderate-Persistent | 58         | 60         | 118        | 29%         |                                        |
| Asthma Severity: Severe-Persistent   | 8          | 14         | 22         | 5%          |                                        |
| <b>Total</b>                         | <b>279</b> | <b>131</b> | <b>410</b> | <b>100%</b> |                                        |
| BMI: Normal                          | 155        | 84         | 239        | 58%         | 0.1576                                 |
| BMI: Overweight                      | 40         | 19         | 59         | 14%         |                                        |
| BMI: Obese                           | 84         | 28         | 112        | 27%         |                                        |
| <b>Total</b>                         | <b>279</b> | <b>131</b> | <b>410</b> | <b>100%</b> |                                        |
| Medication Adherence: Yes            | 221        | 99         | 320        | 78%         | 0.4432                                 |
| Medication Adherence: No             | 58         | 32         | 90         | 22%         |                                        |
| <b>Total</b>                         | <b>279</b> | <b>131</b> | <b>410</b> | <b>100%</b> |                                        |
| Smoking: Yes                         | 47         | 25         | 72         | 18%         | 0.5802                                 |
| Smoking: No                          | 232        | 106        | 338        | 82%         |                                        |
| <b>Total</b>                         | <b>279</b> | <b>131</b> | <b>410</b> | <b>100%</b> |                                        |
| 18-Month Clinic No-Shows: 0 (Zero)   | 246        | 91         | 337        | 82%         | <.0001*                                |
| 18-Month Clinic No-Shows: 1-to-2     | 29         | 24         | 53         | 13%         |                                        |

|                                         |            |            |            |             |         |
|-----------------------------------------|------------|------------|------------|-------------|---------|
| 18-Month Clinic No-Shows: 3-to-4        | 4          | 8          | 12         | 3%          |         |
| 18-Month Clinic No-Shows: >4            | 0          | 8          | 8          | 2%          |         |
| <b>Total</b>                            | <b>279</b> | <b>131</b> | <b>410</b> | <b>100%</b> |         |
| 18-Month Clinic Cancellations: 0 (Zero) | 145        | 42         | 187        | 46%         |         |
| 18-Month Clinic Cancellations: 1-to-5   | 127        | 74         | 201        | 49%         | <.0001* |
| 18-Month Clinic Cancellations: ≥6       | 7          | 15         | 22         | 5%          |         |
| <b>Total</b>                            | <b>279</b> | <b>131</b> | <b>410</b> | <b>100%</b> |         |

**Table S3.** Contingency Analysis for DV3.

| Parameter                            | Non-Users  | Users      | Total      | %           | Fisher's Exact Test<br><i>p</i> -Value |
|--------------------------------------|------------|------------|------------|-------------|----------------------------------------|
| <i>Individual Demographics (IVs)</i> |            |            |            |             |                                        |
| Age: 0-to-<8 years                   | 129        | 76         | 205        | 50%         | 0.5990                                 |
| Age: 8-to-<13 years                  | 88         | 53         | 141        | 34%         |                                        |
| Age: 13-to-<17 years                 | 34         | 13         | 47         | 11%         |                                        |
| Age: ≥17 years                       | 12         | 5          | 17         | 4%          |                                        |
| <b>Total</b>                         | <b>263</b> | <b>147</b> | <b>410</b> | <b>100%</b> |                                        |
| Gender: Male                         | 177        | 94         | 271        | 66%         | 0.5149                                 |
| Gender: Female                       | 86         | 53         | 139        | 34%         |                                        |
| <b>Total</b>                         | <b>263</b> | <b>147</b> | <b>410</b> | <b>100%</b> |                                        |
| Race: Caucasian                      | 101        | 34         | 135        | 33%         | 0.0013*                                |
| Race: African-American               | 124        | 99         | 223        | 54%         |                                        |
| Race: Hispanic                       | 15         | 6          | 21         | 5%          |                                        |
| Race: Other                          | 23         | 8          | 31         | 8%          |                                        |
| <b>Total</b>                         | <b>263</b> | <b>147</b> | <b>410</b> | <b>100%</b> |                                        |
| Insurance: Medicaid                  | 132        | 99         | 231        | 56%         | 0.0017*                                |
| Insurance: Private                   | 128        | 47         | 175        | 43%         |                                        |
| Insurance: Other                     | 3          | 1          | 4          | 1%          |                                        |
| <b>Total</b>                         | <b>263</b> | <b>147</b> | <b>410</b> | <b>100%</b> |                                        |
| <i>Individual Risk Factors (IVs)</i> |            |            |            |             |                                        |
| Asthma Severity: Intermittent        | 49         | 9          | 58         | 14%         | <.0001*                                |
| Asthma Severity: Mild-Persistent     | 159        | 53         | 212        | 52%         |                                        |
| Asthma Severity: Moderate-Persistent | 50         | 68         | 118        | 29%         |                                        |
| Asthma Severity: Severe-Persistent   | 5          | 17         | 22         | 5%          |                                        |
| <b>Total</b>                         | <b>263</b> | <b>147</b> | <b>410</b> | <b>100%</b> |                                        |
| BMI: Normal                          | 145        | 94         | 239        | 58%         | 0.1427                                 |
| BMI: Overweight                      | 38         | 21         | 59         | 14%         |                                        |
| BMI: Obese                           | 80         | 32         | 112        | 27%         |                                        |
| <b>Total</b>                         | <b>263</b> | <b>147</b> | <b>410</b> | <b>100%</b> |                                        |
| Medication Adherence: Yes            | 208        | 112        | 320        | 78%         | 0.5346                                 |
| Medication Adherence: No             | 55         | 35         | 90         | 22%         |                                        |
| <b>Total</b>                         | <b>263</b> | <b>147</b> | <b>410</b> | <b>100%</b> |                                        |
| Smoking: Yes                         | 42         | 30         | 72         | 18%         | 0.2800                                 |
| Smoking: No                          | 221        | 117        | 338        | 82%         |                                        |
| <b>Total</b>                         | <b>263</b> | <b>147</b> | <b>410</b> | <b>100%</b> |                                        |
| 24-Month Clinic No-Shows: 0 (Zero)   | 128        | 43         | 171        | 42%         | <.0001*                                |
| 24-Month Clinic No-Shows: 1-to-2     | 92         | 56         | 148        | 36%         |                                        |

|                                        |            |            |            |             |         |
|----------------------------------------|------------|------------|------------|-------------|---------|
| 24-Month Clinic No-Shows: 3-to-4       | 29         | 21         | 50         | 12%         | 0.0028* |
| 24-Month Clinic No-Shows: >4           | 14         | 27         | 41         | 10%         |         |
| <b>Total</b>                           | <b>263</b> | <b>147</b> | <b>410</b> | <b>100%</b> |         |
| 24-Month Clinic Cancellations: 1-to-5  | 164        | 70         | 234        | 57%         |         |
| 24-Month Clinic Cancellations: 6-to-10 | 72         | 46         | 118        | 29%         |         |
| 24-Month Clinic Cancellations: ≥11     | 27         | 31         | 58         | 14%         |         |
| <b>Total</b>                           | <b>263</b> | <b>147</b> | <b>410</b> | <b>100%</b> |         |
